# Correlations between kidney and heart function bioindicators and the expressions of Toll-Like, ACE2, and NRP-1 receptors in COVID-19

Rabab Hussain Sultan<sup>1\*</sup>, Maged Abdallah<sup>2</sup>, Tarek Mohamed Ali<sup>3</sup>, Hebatallah Hany Assal<sup>4</sup>, Amr E. Ahmed<sup>1</sup>, Basem H Elesawy<sup>5</sup>, and Osama M. Ahmed<sup>6</sup>

1 Biotechnology and Life Sciences Department, Faculty of Postgraduate Studies for Advanced Sciences, Beni-Suef University, Beni-Suef, Egypt.

2 Department of anesthesia and intensive care, Kasr Alaini hospital, Cairo University, Egypt.

3 Department of Physiology, College of Medicine, Taif University, P.O. Box 11099, Taif 21944, Saudi Arabia.

4 Chest Department, Kasr Alaini hospital, Cairo University, Egypt.

5 Department of Pathology, College of Medicine, Taif University, P.O. Box 11099, Taif 21944, Saudi Arabia.

6 Physiology Division, Department of Zoology, Faculty of Science, Beni-Suef University, P.O. Box 62521, Beni-Suef, Egypt.

Corresponding author: Rabab Hussain Sultan, 00201029819222, E-mail: [rababsoltan080@gmail.com](mailto:rababsoltan080@gmail.com)

## Abstract

---

30 **Background:** COVID-19 impacts the cardiovascular system resulting in myocardial  
31 damage and also affects the kidneys leading to renal dysfunction. This effect is mostly  
32 through the binding with angiotensin-converting enzyme-2 (ACE2) and Neuropilin-  
33 1(NRP-1) receptors. Toll-Like Receptors (TLRs) typically combine with microbial  
34 pathogens and provoke an inflammatory response.

35 **Aim:** This work aims to compare the changes in kidney and heart function bioindicators  
36 and expressions of TLRs (TLR2 and TLR2) as well as ACE2 and NRP-1 receptors in  
37 moderate and severe COVID-19 patients. The correlations between kidney and heart  
38 function bioindicators and expressions of these receptors are also studied.

39 **Patients and Methods:** In this study, 50 healthy control and 100 COVID-19 patients (55  
40 male and 45 female) were enrolled. According to WHO guidelines, these participants  
41 were divided into severe (50 cases) and moderate (50 cases). Serum creatinine, blood  
42 urea, CKMB, LDH, and Troponin I were estimated. We measured the gene expression  
43 for Toll-Like Receptors (TLR2, TLR4), ACE2, and NRP-1 in the blood samples using  
44 quantitative real-time PCR (qRT -PCR).

45 **Results:** In comparison with the healthy group, all patients exhibited a significant  
46 elevation in the serum creatinine, blood urea, cardiac enzymes, and CRP. As well, all  
47 studied patients revealed a significant elevation in the expression levels of TLR2, TLR4,  
48 ACE2, and NRP-1 mRNA. In all patients, CKMB, ACE2, and NRP-1 mRNA expression  
49 levels were positively correlated to both TLR2 and TLR4 expression levels.  
50 Moreover, serum creatinine and blood urea were positively correlated to both TLR2 and  
51 TLR 4 expression levels in the severe group only.

52 **Conclusions:** Our study concluded that expression levels for TLR2, TLR4, ACE2, and  
53 NRP-1 mRNA in both severe and moderate patients were positively correlated with  
54 renal biomarkers and cardiac enzymes. Innate immune markers can be important  
55 because they correlate with the severity of illness in COVID-19.

56  
57 **Keywords:** Renal function; cardiac enzymes; ACE2; NRP-1; TLRs; COVID-19

58  
59  
60  
61  
62

63 **Introduction:**

64 Coronaviruses are described as a large family of enveloped RNA viruses with a single  
65 positive strand. They are capable of infecting humans and many animal species. Based  
66 on their pathogenicity, human coronaviruses can be categorized into many types.

67 Highly pathogenic types include severe acute respiratory syndrome coronavirus (SARS-  
68 CoV), middle east respiratory syndrome coronavirus (MERS-CoV), and the new severe  
69 acute respiratory syndrome coronavirus 2 (SARS-CoV-2) (**Weiss and Navas- Martin,**  
70 **2005**). SARS-CoV-2 has led to the severest pandemic of this century with coronavirus  
71 disease 2019 (COVID-19). With the world's second year of the coronavirus pandemic,  
72 governments are still struggling to immunize their populations to the herd immunity  
73 levels.

74 On November 5, 2021, the total confirmed cases reached about 248,467,363 with  
75 5,027,128 deaths due to COVID-19 worldwide (**WHO, 2021**). Originally recognized as  
76 respiratory disease, COVID-19 interacts with the cardiovascular system and causes  
77 damage to the heart muscle, and results in cardiac and endothelial dysfunction  
78 principally via the angiotensin-converting enzyme 2 (ACE2) receptor (**Wang et al.,**  
79 **2020**). The different tissue tropism between SARS-CoV and SARS-CoV-2 raised the  
80 possibility of additional host factors being involved. SARS-CoV-2 advanced protein  
81 comprises a cleavage site for protease furin which is not found in SARS-CoV (**Peacock**  
82 **et al., 2021**).

83 Cantuti-Castelvetri et al. illustrated that neuropilin-1 (NRP-1), which is known to bind  
84 furin-cleaved substrates, increases the infectivity of SARS-CoV-2 (**Cantuti et al., 2020**).  
85 Viral invasion actuates the host immune system inducing the creation of a large amount  
86 of cytokine and interferons to rule out pathogens. Taking the exception of viral  
87 DNA/RNA, the viral proteins are also considered as targets of the model recognition  
88 receptor. Membrane-linked receptors like (TLRs 1, 2, 4, 6, and 10) refer to viral protein  
89 recognition (**Boozari et al., 2019**). Distinct Toll-like receptors (TLRs) play a protective  
90 and harmful role for a specific virus. The real mechanistic vision of the pathogenicity of  
91 SARS-CoV-2 remains uncertain. This is attributable to the lack of knowledge about why  
92 the virus chose humans as its primary host and in what way the virus can escape the  
93 innate immune system in humans. In particular, the interactions between human TLRs  
94 and viral antigens, and the mechanism of cytokine storms that affect several human  
95 organs, are not mostly known. Though, the pathophysiology of COVID-19 usually  
96 includes the invasion of the virus into the pulmonary alveoli, usually via the respiratory  
97 tract, primarily by way of respiratory droplets, through the airways (**Boozari et al.,**  
98 **2019**). The spike protein, a viral glycoprotein on its capsid, binds to the ACE2 receptor

99 then the RNA genome comes into the host cell through the receptor (**Rothan and**  
100 **Byrareddy 2020**). After being inside the host cell, viral RNA replicates are formed from  
101 mRNA, resulting in quick reproduction of viral RNA and other required structural  
102 proteins. Then again, the viral antigens interact with the host's immune cells and this  
103 interaction initiates pro-inflammatory reactions like vasodilation, increased capillary  
104 permeability, and gathering of humoral factors (**V'kovski et al., 2021**). All these factors  
105 cause the impedance of gas exchange and dyspnea. The exact cause of SARS-CoV-2 and  
106 the character of each constituent of the innate and adaptive immune systems are still  
107 unidentified (**Sette and Crotty 2021**). The deficiency of a comprehensive consideration  
108 of the pathogenic and immunologic characteristics of the virus made the situation even  
109 more alarming to humankind (**V'kovski et al., 2021**). So, this study aims to evaluate the  
110 correlations between mRNA expression levels of Toll-Like Receptors, ACE2 and  
111 Neuropilin-1 receptors, and cardiac and renal dysfunction biomarkers in COVID-19.

112

## 113 **Patients and Methods**

---

114 **Study population:** We received laboratory-confirmed medical records and edited  
115 data of COVID-19 inpatients stated to the National Health Commission in the period  
116 from December 2019 to January 2020. The data deadline for the study was March 2021.  
117 All the participants were isolated at Misr International Hospital, Cairo, Egypt, in the  
118 period from March 2021 to April 2021. Severe COVID-19 patients are defined as those  
119 having hypoxemia ( $\leq 93\%$  percutaneous oxygen saturation (SpO<sub>2</sub>) or  $\geq 30$ /min  
120 respiratory rate on room air who are on the high-flow nasal cannula or noninvasive  
121 mechanical ventilation). Patients not fulfilling the above criteria were weighed as  
122 moderate. Informed printed consent was taken from all participants after the ethical  
123 committee of the institutional review board was permitted this research.

124 Cases of Covid19 were confirmed by the presence of positive results for high-throughput  
125 sequencing or real-time reverse transcriptase-polymerase chain reaction (RT-PCR)  
126 testing of swab samples in the nose and throat (**Raoult et al., 2020**).

127

128 **Patients:** Only cases identified in the laboratory were involved in the study. Eligible  
129 COVID-19 patients aged 20-70 years were divided into 2 groups (50 patients each)  
130 (**Chen et al., 2020**).

131 **Group1**; included patients with moderate symptoms infected by a coronavirus.  
132 **Group2**; included patients with severe symptoms infected by a coronavirus and  
133 admitted to the intensive care unit (ICU).

134 **Inclusion and Exclusion Criteria:** Healthy individuals were chosen as COVID-19  
135 free volunteers. All patients were recruited between 20-70-year-old and were diagnosed  
136 as having COVID-19 according to their PCR and chest CT, as identified by WHO  
137 2020. Key exclusion criteria included hypertensive patients treated with ACE2  
138 inhibitors, pre-existing respiratory disorder, kidney or liver failure, thyroid dysfunction,  
139 autoimmune disorders, cerebrovascular diseases, heart diseases, pregnant and lactating  
140 women. In addition, patients who receive immunomodulatory drugs or those who have  
141 medical conditions such as other infections, malignant tumors, and alcohol abuse.

142 **The demographic data:** Anthropometric variables such as gender and body mass  
143 index (BMI) were obtained.

144 **Blood samples:** Serum samples were rapidly separated, aliquoted, and stored at - 40°C  
145 until the biochemical measurements. Serum CK-MB and Troponin I were determined by  
146 a standard sandwich enzyme-linked immune-sorbent assay (ELISA) Kit gotten from  
147 R&D Systems (USA) as guided by the manufacturer. Gene expression of ACE2 mRNA,  
148 NRP-1 mRNA, TLR2, TLR4 were spotted in the healthy control, moderate and severe  
149 groups in blood samples (**Chen et al., 2020**) using quantitative real-time PCR (qRT-  
150 PCR). Gene sequence (5'-3') procedures were performed conferring to the kit  
151 instructions provided in the laboratory assay.

152 **Laboratory assays:**

153 Serum creatinine levels were determined using reagent kits bought from Diamond  
154 Diagnostics (Egypt) conferring to the technique of **Henry (1974) (Henry et al., 1974)**.

155 Urea concentration was determined according to the technique of **Kaplan (1984)**  
156 (**Kaplan 1984**) using a reagent kit purchased from Diamond Diagnostics (Egypt). Serum  
157 lactate dehydrogenase (LDH) activity was measured according to the method of  
158 **Buhland Jackson (1978) (Buhland and Jackson 1978)**.

159 **RNA isolation and qRT-PCR:**

160 Blood samples of all groups were used separately to extract total RNA via TRIzol  
161 Reagent purchased from Fermentas, Germany. Then cDNA synthesis was performed  
162 utilizing the High-Capacity cDNA Reverse Transcription Kit purchased from Invitrogen,  
163 Germany according to the manufacturer's directions.

164 Real-time PCR was carried out in a 20  $\mu$ L system having 10  $\mu$ L of 1x Sso- Fast Eva  
165 Green Supermix (Bio-Rad, Hercules, CA, USA), 2  $\mu$ L of cDNA, 6  $\mu$ L of RNase/DNase-  
166 free water, and 500nM of the primer pair sequences: NPR1, F:5-AACAACGGCTCGGA  
167 CTGGAAGA-3 and R:5-GGTAGATCCTGATGAATCGCGTG -3 (NM001024628);  
168 ACE2, F: 5-TCCATTGGTCTTCTGTCACCCG-3 and R: 5-AGACCATCCACCTCC  
169 ACTTCTC-3 (NM021804.3)  $\beta$ -actin, F: 5-GGAACGGTGAAGGTGACAGCAG-3 and  
170 R-5-TGTGGACTTGGGAGAGGACTGG-3 (XM004268956.3); TLR2, F: 5-ATCCTCC  
171 AATCAGGCTTCTCT3 and R-5ACACCTCTG TAGGTCACT GTTG3 (NM00131878  
172 9.2); TLR4, F:5-ATATTGACAGGAAACCCCATCCA-3, and R:  
173 AGAGAGATTGAGT AGGGGCATTT-3 (NM138554.5);  $\beta$ -  
174 actin, F-5AGGAACGGTGAAGGTGACAGCA G-3 and R-  
175 5TGTGGACTTGGGAGAGGACTGG-3 (XM00426 8956.3).

176 The amplification data were analyzed by using the manufacturer's programmer  
177 according to **Livak and Schmittgen** methods (**Livak and Schmittgen 2001**) and the  
178 variables were normalized to  $\beta$ -actin.

### 179 **Statistical analysis.**

---

180 The result values were accessible as mean  $\pm$  standard error. SPSS version 20 for  
181 Windows (IBM Corp., 2011) was used for data analysis. The one-way analysis of  
182 variance (ANOVA) was used to show the statistical differences among groups. This was  
183 followed by Duncan's method for post hoc analysis. By means of the Pearson correlation  
184 coefficients method, correlation analysis was estimated between different studied  
185 parameters. P-value < 0.05 has been considered as being statistically significant.

### 187 **Results:**

---

188 Table 1 shows that the age was significantly higher (p=0.000) in moderate and severe  
189 cases compared to healthy controls. Male patients in severe cases were more than female  
190 patients. On the other hand, BMI was insignificant (p>0.05) in both infected groups  
191 compared to healthy control.

192 Table 1 shows the levels of the kidney function biomarkers and the cardiac enzymes in  
193 all groups. Serum creatinine was significantly higher in severe cases (p=0.000) than in  
194 moderate and control cases. No significant difference was found between moderate and  
195 control cases. The levels of serum high-sensitivity C-reactive protein (hsCRP)  
196 (p=0.000), creatinine kinase MB (CKMB) (p=0.000), lactate dehydrogenase (LDH)  
197 (p=0.000), and troponin I (p<0.01) were significantly increased among the severe group

198 and moderate group compared to healthy control. Serum (hsCRP) ( $p=0.000$ ) and levels  
199 of lactate dehydrogenase (LDH) ( $p=0.000$ ) were significantly higher among the severe  
200 group compared to the moderate group.

201

202 Table (1): Demographic and Laboratory findings of severe and moderate COVID-19.

|                          | Healthy controls | Moderate patients              | Severe patients             |
|--------------------------|------------------|--------------------------------|-----------------------------|
|                          | (n=50)           | (n=50)                         | (n=50)                      |
| Age (Year)               | 34.12±1.24       | 58.24±1.24 <sup>***</sup>      | 57.36±1.43 <sup>***</sup>   |
| Gender, no. (%)          |                  |                                |                             |
| Male                     | 25(50%)          | 25(50%)                        | 29 (58%)                    |
| Female                   | 25(50%)          | 25(50%)                        | 21 (42%)                    |
| BMI (kg/m <sup>2</sup> ) | 24.25±0.35       | 24.73±0.48                     | 25.03±0.52                  |
| CRP(mg/dl)               | 1.97 ±0.19       | 61.90 ±6.05 <sup>+ ***</sup>   | 73.92 ±3.42 <sup>***</sup>  |
| Creatinine (mg/dl)       | 0.89 ±0.03       | 0.85 ±0.06 <sup>+++</sup>      | 1.75 ±0.30 <sup>**</sup>    |
| Urea (mg/dl)             | 25.1 ±0.93       | 48.68 ± 5.49 <sup>+++ **</sup> | 79.52 ± 9.14 <sup>***</sup> |
| CKMB (ng/ml)             | 1.29 ±0.05       | 4.07 ±0.29 <sup>***</sup>      | 3.55 ±0.20 <sup>***</sup>   |
| LDH (mg/dl)              | 261.6±3.00       | 339.24±25.96 <sup>++ **</sup>  | 418.7±26.12 <sup>***</sup>  |
| Troponin I (ng/ml)       | 0.02 ±0.002      | 0.03 ±0.003                    | 0.04 ±0.01 <sup>***</sup>   |

203 Table 1: Data are presented as mean+/-SE. BMI: Body mass index, CRP: C-reactive protein,  
204 CKMB: creatinine kinase Myocardial Band, LDH: Lactate dehydrogenase was significantly  
205 different at <sup>\*\*</sup>  $P < 0.01$  level, <sup>\*\*\*</sup>  $P < 0.001$  level versus healthy controls, and <sup>+</sup>  $P < 0.05$ , <sup>+++</sup>  $P < 0.001$   
206 versus severe group.

207

## 208 Discussion

209 The COVID-19 is a global pandemic. From its starting to spread in December 2019, this  
210 viral infection continued to spread internationally. So, efforts are instantly done to stop  
211 this virus invasion and guard the world.

212 To progress an effective treatment and vaccine for COVID-19 infection, decoding the  
213 precise immune response to this infection is an essential step. In this case, recovery and  
214 disease severity were linked to appropriate immune responses and impaired immune  
215 reactions, respectively. Our present data has revealed an increase in serum creatinine and  
216 blood urea nitrogen (BUN) compared to patients with normal kidney function. In

217 agreement with our results, **Cheng et al.** their clinical evidence has shown an elevation  
218 in both serum creatinine and BUN in COVID-19 patients, and near 5% of their  
219 prospective study in China, patients were diagnosed with acute kidney injury during  
220 hospitalization (**Cheng et al., 2020**).

221 **Ahmadian et al.; Buonaguro et al.; Huang et al. and Wan et al.** reported that  
222 kidney dysfunction mainly acute kidney injury, occurs in cases with COVID-19 within 3  
223 weeks after the beginning of the symptoms; nevertheless, kidney complications are  
224 linked to the higher death rate. They concluded that COVID-19 induced organ  
225 impairment is mostly facilitated by cytokine storms and that strategies to diminish or  
226 eradicate inflammatory cytokines would be effective in avoiding cytokine-induced organ  
227 injury. Aiming to the creation of IL1, IL6, TNF, and INF- $\gamma$  related-inhibitors are  
228 reported (**Ahmadian et al., 2021; Buonaguro et al., 2020; Huang et al., 2020 and Wan**  
229 **et al., 2020**). Kidney injury induced by the SARS-CoV-2 virus is probably related to  
230 several factors. The virus can infect renal podocytes and cells of the proximal tubules.  
231 Disruptive glomerulopathy, leakage of protein in Bowman's capsule, acute tubular  
232 necrosis, and mitochondrial damage based on the angiotensin-converting enzyme 2  
233 (ACE2) pathway (**Fan et al., 2021**).

234 Acute kidney injury can result from dysregulation of the immune response, such as  
235 cytokine storms and macrophage activation syndrome with lymphopenia (**Ahmadin et**  
236 **al., 2021**). The development of cytokine storms after viral infection, directly and  
237 indirectly, affects the kidneys and can induce sepsis, shock, hypoxia, and  
238 rhabdomyolysis. Among the other probable causes of kidney injury induced by COVID-  
239 19 is the organ interactions between the pulmonary, cardiac, and renal tissues (**Qian et**  
240 **al., 2021**).

241 The present study detected a highly significant upsurge of ACE2 mRNA receptor  
242 expressions, NRP-1 mRNA co-receptors, in COVID-19 patients.

243 This finding was consistent with the results of **Imig and Ryan; Cantuti-Castelvetri et**  
244 **al.; Daly et al.; Freeman and Swartzand** who reported that one of the major receptors  
245 for SARS-CoV-2 is ACE2 which is broadly dispersed in the lung, intestinal, liver, heart,  
246 vascular endothelium, testis, and kidney cells.

247 The fact that ACE2 is expressed in respiratory and olfactory epithelial cells at very low  
248 protein levels increases the likelihood that other factors are needed to promote virus-host  
249 cell communications in the cells that express low ACE2. NRP-1 may be considered as  
250 an ACE2 enhancer by facilitating the interface of the virus and ACE2. In addition, TLRs  
251 are associated with acute kidney injury, which correlates with the severity of renal



252 disease and inflammatory markers (**Imig and Ryan 2013; Cantuti-Castelvetri et al.,**  
253 **2020; Daly et al., 2020 and Freeman and Swartz 2020).**

254 Moreover, **Rivero et al. and Choudhury and Mukherjee**, concluded these TLRs (2  
255 and 4) can encourage the expression of chemokine in epithelial cells of renal tubules  
256 (**Rivero et al., 2009 Choudhury and Mukherjee 2020**). Viruses interrelate with precise  
257 receptors to enter target cells. SARS-CoV-2 interacts with the angiotensin-converting  
258 enzyme 2 receptors (ACE2), which is broadly distributed in the lung, intestinal, liver,  
259 heart, vascular endothelium, testis, and kidney cells (**Gheblawi et al., 2020**). With the  
260 help of the type II transmembrane serine protease (TMPRSS2), SARS-CoV-2 comes  
261 into the host cells by endocytosis (**Hoffman et al., 2020**). Zhang et al. revealed that  
262 severe COVID-19 patients must show a hyper inflammation nature in comparison to  
263 non-severe patients (**Zhang et al., 2020**).

264 S1 subunit of the S spike of SARS-CoV-2 has a c-terminal domain that guarantees a  
265 very high attraction for the ACE2 receptor (**Huang et al., 2020**). This declines the ACE2  
266 expression on the cell surface and upsurges inflammation leading to tissues destruction  
267 (**Li et al., 2020**). ACE2 plays an anti-inflammatory role by converting angiotensin II into  
268 angiotensin (1-7) (**Issa et al., (2021)** and reducing vaso-permeability, edema, and  
269 pulmonary neutrophil infiltration.

270 **Ziegler et al.** recommended that SARS-CoV-2 may raise ACE2 expression and further  
271 increase infection (**Ziegler et al., 2020**). The spike protein of SARS-CoV-2 comprises a  
272 cleavage site for the protease furin which is lacking in SARS-CoV. **Cantuti Castelvetri**  
273 **et al.** presented that neuropilin-1 (NRP-1), which is identified to bind to furin-cleaving  
274 substrates, enhances SARS-CoV-2 infectivity (**Cantuti-Castelvetri et al., 2020**).

275 **Daly et al.** reported that the furin-cleaving S1 fragment of the spike protein directly  
276 combines to cell surface NRP-1 and the blocking of this contact with small molecule  
277 inhibitors or monoclonal antibodies, will reduce viral invasion in cell culture (**Daly et**  
278 **al., 2020**). Viral invasion initiates inflammation, stimulation of specialized antigen-  
279 presenting cells (APCs) that make the viral peptides presentable to T cells (CD4 and  
280 CD8) and stimulates B cells directly. Inflammation is dependent on the first line of  
281 innate immune response (**Shah et al., 2020**). As soon as SARS-CoV-2 enters the host  
282 cell, it triggers the pyrin domain containing 3 (NLRP3) inflammasome, one of the Nod-  
283 like receptor family. Once the viral RNA interacts with TLRs 3, 7, 8, and 9, A  
284 downstream of the NF- $\kappa$ B pathway becomes activated, which augments the production  
285 of pro-inflammatory cytokines (**Browne 2020**). TLR2 and TLR4 are crucial due to their  
286 exciting capability to identify different molecular forms of attacking pathogens

287 **(Mukherjee et al., 2016)**. Subsequently, the inflammation twitches and the activated  
288 immune cells explode the release of a large number of cytokines. Collectively, these  
289 mechanisms participate in augmenting the inflammatory response that plays a major role  
290 in the pathogenesis of COVID-19 **(Ye et al., 2020)**. The "cytokine storm syndrome" is  
291 believed to be a major underlying factor in the immune-pathogenicity of COVID-19.  
292 This storm is responsible for the start of tissue damage, hyper inflammation, and even  
293 mortality **(Tang et al., 2020)**. It was activated by the hyperactivation of immune cells  
294 leading to a boom of cytokines release. The overexpression of induced IL-10,  
295 macrophage IL-1  $\alpha$ , hepatocyte growth factor, IFN- $\gamma$ , IL-3, and were highly related to  
296 the severity of the disease **(Tang et al., 2020)**. **Freeman and Swartz** concluded that  
297 SARS-CoV-2 is typified by strong and fast stimulation of the innate immune defense,  
298 involving triggering of the NLRP3 pathway, and the release of the IL-6 and IL-1 **(Daly**  
299 **et al., 2020)**. **Blanco-Melo et al.** verified that SARS-CoV-2 infection of the epithelial  
300 cells of human bronchi gave rise to the expression of numerous cytokines and  
301 chemokines like TNF- $\alpha$ , IL-1 $\beta$ , and IL-6 **(Blanco-Melo et al., 2020)**. In addition, our  
302 present data showed an elevated troponin I, lactate dehydrogenase (LDH), and CKMB in  
303 moderate and severe COVID-19 patients when compared with the control group.  
304 COVID-19 has been shown to interrelate and disturb the cardiovascular system,  
305 primarily via the ACE2 receptor, resulting in myocardial damage, cardiac damage, and  
306 endothelial dysfunction **(Basu-Ray et al., 2020)**. The interface of SARS-CoV-2 with  
307 ACE2 can give rise to changes in the ACE2 pathways, causing acute cardiac injury. A  
308 few studies propose that SARS-CoV-2 can result in viral myocarditis by direct infection  
309 of the myocardium. In many cases, myocardial damage seems to be triggered by  
310 increased cardiac metabolic demand which accompanies systemic infections and  
311 persistent severe pneumonia-induced hypoxia **(Basu-Ray et al., 2020 and Bugert et al.,**  
312 **2021)**. Moreover, the release of high levels of interleukin 2, 10, 6, 8, and TNF- $\alpha$  can  
313 harm several tissues, like vascular endothelium and cardiac myocytes **(Tang et al.,**  
314 **2020)**. Cytokine storms may be associated with the dangerousness of the disease **(Hojoyo**  
315 **et al., 2020)**. In a series of situations that affect the kidneys as well as the heart,  
316 dysfunction of one organ can encourage dysfunction of the other organ. Chronic or acute  
317 systemic conditions can impair the function of these two organs **(Damman and Testani**  
318 **2015)**. COVID-19-induced acute kidney injury may be related to the crosstalk between  
319 the cardiovascular system and the kidney. COVID-19 set off myocarditis to weaken the  
320 cardiac output and affect end-organ perfusion. Additionally, the associated proper  
321 ventricular disorder produces diastolic disorder and venous congestion that transmit back

322 to the kidney and in addition compromise its blood supply via way of means of growing  
323 kidney congestion (**Legrand et al., 2021**). In addition, acute viral myocarditis together  
324 with cytokine cardiomyopathy can induce hypotension, renal venous congestion, and  
325 decreased renal blood flow, which can decrease the glomerular filtration rate (**Faour et**  
326 **al., 2022**).

## 327 **Conclusions**

---

328 Our study concluded that impaired renal biomarkers and cardiac enzymes may be  
329 attributed to increased expression levels of TLR2, TLR4, ACE2, and NRP-1 mRNA in  
330 both severe and moderate COVID-19 patients. So. it is critical to recognize the  
331 molecular mechanisms and focus on the vital molecules involved in the pathogenicity of  
332 the diseases to design novel drugs to control and prevent the disease. By blocking the  
333 virus access pathways including the viral receptors and regulating immune responses we  
334 can reduce multi-organ dysfunction induced by COVID-19.

335

## 336 **Supporting information**

---

337 **Fig 1 :** (A, B) shows a comparison between the relative expression of TLR-2 and TLR-  
338 4 in all studied groups. There were significant ( $p=0.000$ ), ( $p=0.000$ ) increases  
339 respectively, in TLR2, TLR4 expression levels in moderate and severe cases compared  
340 to healthy controls.

341 **Fig 1:** (A) TLR2; Toll-like receptor 2 and (B) TLR4; Toll-like receptor 2 in moderate  
342 and severe groups compared to healthy controls.

343 **Fig 2:** (C, D) shows a comparison between the relative ACE2 and NRP-1 mRNA  
344 expression levels. This figure exhibited that ACE2 and NRP-1 mRNA expression levels  
345 were significantly ( $p=0.000$ ,  $p=0.000$  respectively), increased in the moderate group and  
346 severe group compared to the healthy controls group.

347 **Fig 2:** (C) ACE2; Angiotensin-converting enzyme- 2 and (D) NPR-1; Neuropilin-1 in  
348 moderate and severe groups compared to healthy control

349 **Fig 3: (E-I) in the moderate group**, shows a significant positive correlation between  
350 urea and TLR2 ( $p=0.000$ ). Also, positively correlated between CKMB and Troponin I  
351 with both TLR2 ( $p=0.000$ ), ( $p<0.05$ ) and TLR4 ( $p=0.000$ ,  $p=0.000$ , respectively).

352 **Fig 3: (E-I)** Correlations among the moderate group, between TLR2 with (E) urea, (F)  
353 CKMB, (G) Troponin I and TLR4 with (H) CKMB, (I) Troponin I. Correlation was  
354 significant \*\* at the 0.01 level, \*\*\* at the 0.001 level. CKMB: creatinine kinase  
355 myocardial band; TLR2, 4: Toll-like receptor 2, 4.

356 **Fig4: (J-M)** ACE2 and NRP-1 mRNA expression levels, exhibited a significant positive  
357 ( $p=0.000$ ) correlation with TLR2, TLR4 in the moderate group.

358 **Fig 4: (J-M)** Correlations among the moderate group, between ACE2 with (J) TLR2, (K)  
359 TLR4, and NRP-1 with (L) TLR2, (M) TLR4. The correlation was significant \*\* at the 0.01  
360 level, \*\*\* at the 0.001 level. ACE2: Angiotensin-converting enzyme; NPR1: Neuroplini-1  
361 and TLR2, 4: Toll-like receptor 2, 4.

362 **Fig 5 :( N-Q) in the severe group**, both serum creatinine and urea were positively  
363 correlated to TLR2 and TLR4 ( $p<0.05$ ).

364 **Fig 5: (N-Q)** Correlations among the severe group, between creatinine with (N)  
365 TLR2, (O) TLR4, and urea with (P) TLR2, (Q) TLR4. The correlation was significant  
366 \*\* at the 0.01 level, \*\*\* at the 0.001 level. TLR2, 4: Toll-like receptor 2, 4.

367 **Fig 6 :( R-T)** CKMB showed a positive correlation with TLR2 ( $p=0.000$ ) and TLR4  
368 ( $p<0.05$ ). Furthermore, Troponin I observed a positive correlation with TLR4 ( $p<0.05$ )  
369 among the severe group.

370 **Fig 6: (R-T)** Correlations among the severe group, between CKMB with (R) TLR2, (S)  
371 TLR4 and Troponin I with (T) TLR4. The correlation was significant \*\* at the 0.01  
372 level, \*\*\* at the 0.001 level. CKMB: creatinine kinase myocardial band; TLR2, 4: Toll-  
373 like receptor 2, 4.

374 **Fig 7 :( U, V)** shows that ACE2 mRNA expressions were positively ( $p=0.000$ )  
375 correlated

376 with TLR2 and TLR4 in the severe group.

377 **Fig 7: (U, V)** Correlations among the severe group, between ACE2 with (U) TLR2,  
378 (V) TLR4. The correlation was significant \*\* at the 0.01 level, \*\*\* at the 0.001 level.

379 ACE2: Angiotensin-converting enzyme; TLR2, 4: Toll-like receptor 2, 4.

380 **Fig 8: (W, X)** shows that NRP-1 mRNA expressions were positively (p=0.000)  
381 correlated

382 to TLR2 and TLR4 in the severe group.

383 **Fig 8: (W, X)** Correlations among the severe group, between NRP-1 with (W) TLR2,  
384 (X) TLR4. The correlation was significant \*\* at the 0.01 level, \*\*\* at the 0.001 level.

385 ACE2: Angiotensin-converting enzyme; NPR-1: Neuroplini-1; TLR2, 4: Toll-like  
386 receptor 2, 4.

## 387 **Acknowledgments**

388 The authors would like to thank Taif University, Taif, Saudi Arabia for supporting this  
389 research (Taif University researchers supporting project number: TURSP-2020/127).  
390 Thank you very much Dr. Ahmed Abdelhafeiz consultant of Medical Biochemistry - Al  
391 Azhar University.

392

## 393 **Funding**

394 “This work was supported by [Taif University, Taif, Saudi Arabia] (Grant number  
395 [TURSP-2020/127]. The author, Basem Hassan Elesawy has received research support  
396 from Taif University, Taif, Saudi Arabia.”

397

## 398 **Ethics Statement**

399 The studies were reviewed and approved by the Ethics Committee of Faculty of Post-  
400 graduate studies for Advanced Science, Beni-Suef University, Egypt, and approval  
401 from Misr International Hospital was obtained.

## 402 **Consent to participate**

403 All patients/participants or their relatives provided their written informed consent to  
404 participate in this study.

#### 405 **Authors contribution**

406 Conceptualization: [Maged Abdallah, Osama M. Ahmed]; Methodology: [Rabab  
407 Hussain Sultan, Amr E. Ahmed, Basem Hassan Elesawy, Maged Abdallah]; Formal  
408 analysis and investigation: [Hebatallah Hany Assal, Tarek Mohamed Ali, Osama M.  
409 Ahmed]; Writing - original draft preparation: [Rabab Hussain Sultan, Tarek Mohamed  
410 Ali, Osama M. Ahmed]; Writing - review and editing: [Tarek Mohamed Ali, Osama M.  
411 Ahmed, Hebatallah Hany Assal]; Funding acquisition: [Basem Hassan Elesawy];  
412 Resources: [Rabab Hussain Sultan, Maged Abdallah, Tarek Mohamed Ali, Hebatallah  
413 Hany Assal, Amr E. Ahmed, Basem Hassan Elesawy]; Supervision: [Osama M. Ahmed,  
414 Maged Abdallah, Hebatallah Hany Assal, Amr E. Ahmed].

#### 415 **Competing Interests**

416 “The authors have no relevant financial or non-financial interests to disclose.”

#### 417 **Consent to publish**

418 All authors agreed with the content and that all gave explicit consent to submit and that  
419 they obtained consent from the responsible authorities at the institute/organization where  
420 the work has been carried out **before** the work is submitted.

#### 421 **Data and availability of material**

422 All authors guarantee transparency on the re-use of material and that there is no  
423 unpublished material (for example manuscripts in press) included in the manuscript

## 424 **References**

- 425 **Ahmadian, E.; Hosseiniyan Khatibi, S. M.; Razi Soofiyani, S.; Abediazar, S.;**  
426 **Shoja, M. M.; Ardalan, M. and Zununi Vahed, S. (2021):** COVID-19 and kidney  
427 injury: Pathophysiology and molecular mechanisms. *Reviews in medical*  
428 *virology*, 31(3), e2176.
- 429 **Basu-Ray, I.; Almaddah, N. K.; Adeboye, A. and Soos, M. P. (2021):** Cardiac  
430 Manifestations Of Coronavirus (COVID-19). In *StatPearls*. StatPearls Publishing.
- 431 **Blanco-Melo, D.; Nilsson-Payant, B. E.; Liu, W. C.; Uhl, S.; Hoagland, D.; Møller,**  
432 **R.; Jordan, T. X.; Oishi, K.; Panis, M.; Sachs, D.; Wang, T. T.; Schwartz, R. E.;**  
433 **Lim, J. K.; Albrecht, R. A., and tenOever, B. R. (2020):** Imbalanced Host Response  
434 to SARS-CoV-2 Drives Development of COVID-19. *Cell*, 181(5), 1036–1045.e9.
- 435 **Boozari, M.; Butler, A.E. and Sahebkar A. (2019):** Impact of curcumin on toll-like  
436 receptors. *J Cell Physiol.* 2019; 234(8):12471-12482.
- 437 **Browne E. P. (2020):** The Role of Toll-Like Receptors in Retroviral  
438 Infection. *Microorganisms*, 8(11), 1787.
- 439 **Bugert, C. L.; Kwiat, V.; Valera, I. C.; Bugert, J. J. and Parvatiyar, M. S. (2021):**  
440 Cardiovascular Injury Due to SARS-CoV-2. *Current clinical microbiology reports*, 1–  
441 11. Advance online publication.
- 442 **Buhl, S. N. and Jackson, K. Y. (1978):** Optimal conditions and comparison of lactate  
443 dehydrogenase catalysis of the lactate-to-pyruvate and Pyruvate-to-lactate in human  
444 serum at 25, 30- and 37-degree C. *Clin. Chem.*, 24: 828.
- 445 **Buonaguro, F. M.; Ascierto, P. A.; Morse, G. D.; Buonaguro, L.; Puzanov, I.;**  
446 **Tornesello, M. L.; Bréchet, C. and Gallo, R. C. (2020).** Covid-19: Time for a  
447 paradigm change. *Reviews in medical virology*, 30(5), e2134.
- 448 **Cantuti-Castelvetri, L.; Ojha, R.; Pedro, L. D.; Djannatian, M.; Franz, J.;**  
449 **Kuivanen, S.; van der Meer, F.; Kallio, K.; Kaya, T.; Anastasina, M.; Smura, T.;**  
450 **Levanov, L.; Szirovicza, L.; Tobi, A.; Kallio-Kokko, H.; Österlund, P.; Joensuu,**  
451 **M.; Meunier, F. A.; Butcher, S. J.; Winkler, M. S. and Simons, M. (2020):**  
452 Neuropilin-1 facilitates SARS-CoV-2 cell entry and infectivity. *Science (New York,*  
453 *N.Y.)*, 370(6518), 856–860.

- 454 **Chen, G.; Wu, D.; Guo, W.; Cao, Y.; Huang, D.; Wang, H.; Wang, T.; Zhang, X.;**  
455 **Chen, H.; Yu, H.; Zhang, X.; Zhang, M.; Wu, S.; Song, J.; Chen, T.; Han, M.; Li,**  
456 **S.; Luo, X.; Zhao, J. and Ning, Q. (2020):** Clinical and immunological features of  
457 severe and moderate coronavirus disease 2019. *The Journal of clinical*  
458 *investigation*, 130(5), 2620–2629.
- 459 **Cheng, Y.; Luo, R.; Wang, K.; Zhang, M.; Wang, Z.; Dong, L.; Li, J.; Yao, Y.;**  
460 **Ge, S. and Xu, G. (2020):** kidney disease is associated with in-hospital death of  
461 patients with COVID-19. *Kidney International*, 97(5), 829–838.
- 462 **Choudhury, A. and Mukherjee, S. (2020):** In silico studies on the comparative  
463 characterization of the interactions of SARS-CoV-2 spike glycoprotein with ACE2  
464 receptor homologs and human TLRs. *Journal of medical virology*, 92(10), 2105–2113.
- 465 **Daly, J. L.; Simonetti, B.; Klein, K.; Chen, K. E.; Williamson, M. K.; Antón-**  
466 **Plágaro, C.; Shoemark, D. K.; Simón-Gracia, L.; Bauer, M.; Hollandi, R.; Greber,**  
467 **U. F.; Horvath, P.; Sessions, R. B.; Helenius, A.; Hiscox, J. A.; Teesalu, T.;**  
468 **Matthews, D. A.; Davidson, A. D.; Collins, B. M.; Cullen, P. J. and ... Yamauchi,**  
469 **Y. (2020):** Neuropilin-1 is a host factor for SARS-CoV-2 infection. *Science (New*  
470 *York, N.Y.)*, 370(6518), 861–865.
- 471 **Damman, K. and Testani, J. M. (2015):** The kidney in heart failure: an  
472 update. *European heart journal*, 36(23), 1437–1444.
- 473 **Fan, C.; Lu, W.; Li, K.; Ding, Y. and Wang, J. (2021):** ACE2 Expression in Kidney  
474 and Testis May Cause Kidney and Testis Infection in COVID-19 Patients. *Frontiers in*  
475 *medicine*, 7, 563893.
- 476 **Faour, W. H.; Choib, A.; Issa, E., Choueiry, F. E.; Shbaklo, K.; Alhajj, M.;**  
477 **Sawaya, R. T.; Harhous, Z.; Alefishat, E. and Nader, M. (2022):** Mechanisms of  
478 COVID-19-induced kidney injury and current pharmacotherapies. *Inflammation*  
479 *research: official journal of the European Histamine Research Society ... [et*  
480 *al.]*, 71(1), 39–56.
- 481 **Freeman, T. L., and Swartz, T. H. (2020):** Targeting the NLRP3 Inflammasome in  
482 Severe COVID-19. *Frontiers in immunology*, 11, 1518.
- 483 **Gheblawi, M.; Wang, K.; Viveiros, A.; Nguyen, Q.; Zhong, J. C.; Turner, A. J.;**  
484 **Raizada, M. K.; Grant, M. B. and Oudit, G. Y. (2020):** Angiotensin-Converting



485 Enzyme 2: SARS-CoV-2 Receptor and Regulator of the Renin-Angiotensin System:  
486 Celebrating the 20th Anniversary of the Discovery of ACE2. *Circulation*  
487 *Research*, 126(10), 1456–1474.

488 **Henry T.J. 2nd ed. Harper and Row Publishers (1974): New York: Clinical**  
489 **Chemistry Principles and techniques.[Google Scholar]**

490 **Hoffmann, M.; Kleine-Weber, H.; Schroeder, S.; Krüger, N.; Herrler, T.;**  
491 **Ericksen, S.; Schiergens, T. S.; Herrler, G.; Wu, N. H.; Nitsche, A.; Müller, M. A.;**  
492 **Drosten, C. and Pöhlmann, S. (2020): SARS-CoV-2 Cell Entry Depends on ACE2**  
493 **and TMPRSS2 and Is Blocked by a Clinically Proven Protease Inhibitor. *Cell*, 181(2),**  
494 **271–280.e8.**

495 **Hojyo, S.; Uchida, M.; Tanaka, K.; Hasebe, R.; Tanaka, Y.; Murakami, M. and**  
496 **Hirano, T. (2020): How COVID-19 induces cytokine storm with high**  
497 **mortality. *Inflammation and regeneration*, 40, 37.**

498 **Huang, C.; Wang, Y.; Li, X.; Ren, L.; Zhao, J.; Hu, Y.; Zhang, L.; Fan, G.; Xu, J.;**  
499 **Gu, X.; Cheng, Z.; Yu, T.; Xia, J.; Wei, Y.; Wu, W.; Xie, X.; Yin, W.; Li, H.; Liu,**  
500 **M.; Xiao, Y. and... Cao, B. (2020): Clinical features of patients infected with 2019**  
501 **novel coronavirus in Wuhan, China. *Lancet (London, England)*, 395(10223), 497–506.**

502 **Huang, Y.; Yang, C.; Xu, X. F.; Xu, W. and Liu, S. W. (2020): Structural and**  
503 **functional properties of SARS-CoV-2 spike protein: potential antiviral drug**  
504 **development for COVID-19. *Acta pharmacologica Sinica*, 41(9), 1141–1149.**

505 **Imig, J. D., and Ryan, M. J. (2013): Immune and inflammatory role in renal**  
506 **disease. *Comprehensive Physiology*, 3(2), 957–976.**

507 index in coronavirus (COVID-19) infected patients. *British journal of*  
508 *haematology*, 189(3), 428–437.

509 **Issa, H.; Eid, A. H.; Berry, B.; Takhviji, V.; Khosravi, A.; Mantash, S.; Nehme,**  
510 **R.; Hallal, R.; Karaki, H.; Dhayni, K.; Faour, W. H.; Kobeissy, F.; Nehme, A. and**  
511 **Zibara, K. (2021): Combination of Angiotensin (1-7) Agonists and Convalescent**  
512 **Plasma as a New Strategy to Overcome Angiotensin-Converting Enzyme 2 (ACE2)**  
513 **Inhibition for the Treatment of COVID-19. *Frontiers in medicine*, 8, 620990.**

- 514 **Kaplan A. (1984):** Urea Clin Chem. Pbl. The C.V. Mosby Co. St Louis. Toronto.  
515 Princeton, PP. 1257-1260 and 437 and 418.
- 516 **Legrand, M.; Bell, S.; Forni, L.; Joannidis, M.; Koyner, J. L.; Liu, K. and**  
517 **Cantaluppi, V. (2021):** Pathophysiology of COVID-19-associated acute kidney  
518 injury. *Nature reviews. Nephrology*, 17(11), 751–764.
- 519 **Li, Y.; Zhou, W.; Yang, L.; You, R. (2020):** Physiological and pathological  
520 regulation of ACE2, the SARS-CoV-2 receptor. *Pharmacological Research*, 157,  
521 104833.
- 522 **Livak, K.J. and Schmittgen, T.D. (2001):** Analysis of relative gene expression data  
523 using real-time quantitative PCR and the 2(-Delta Delta C (T)) method. *Methods*. 2001;  
524 25(4): 402–408.
- 525 **Mukherjee, S.; Karmakar, S. and Babu, S. P. (2016):** TLR2 and TLR4 mediated  
526 host immune responses in major infectious diseases: a review. *The Brazilian journal of*  
527 *infectious diseases: an official publication of the Brazilian Society of Infectious*  
528 *Diseases*, 20(2), 193–204.
- 529 **Peacock, T. P., Goldhill, D. H., Zhou, J., Baillon, L., Frise, R., Swann, O. C.,**  
530 **Kugathasan, R., Penn, R., Brown, J. C., Sanchez-David, R. Y., Braga, L.,**  
531 **Williamson, M. K., Hassard, J. A., Staller, E., Hanley, B., Osborn, M., Giacca, M.,**  
532 **Davidson, A. D., Matthews, D. A., & Barclay, W. S. (2021).** The furin cleavage site  
533 in the SARS-CoV-2 spike protein is required for transmission in ferrets. *Nature*  
534 *microbiology*, 6(7), 899–909.
- 535 **Qian, J. Y.; Wang, B.; Lv, L. L. and Liu, B. C. (2021):** Pathogenesis of Acute  
536 Kidney Injury in Coronavirus Disease 2019. *Frontiers in physiology*, 12, 586589.  
537 <https://doi.org/10.3389/fphys.2021.586589>.
- 538 **Raoult, D.; Zumla, A.; Locatelli, F.; Ippolito, G. and Kroemer, G.**  
539 **(2020):** Coronavirus infections: epidemiological, clinical and immunological features  
540 and hypotheses. *Cell Stress*. 2020; 4:66-75. 10.15698/cst2020.04.216
- 541 **Rivero, A.; Mora, C.; Muros, M.; García, J.; Herrera, H. and Navarro-González,**  
542 **J. F. (2009):** Pathogenic perspectives for the role of inflammation in diabetic  
543 nephropathy. *Clinical science (London, England: 1979)*, 116 (6), 479–492.

- 544 **Rothan, H.A., and Byrareddy, S.N. (2020):** The epidemiology and pathogenesis of  
545 coronavirus disease (COVID-19) outbreak. *J Autoimmun.* 2020;109:102433  
546 10.1016/j.jaut.2020.102433
- 547 **Sette, A., and Crotty, S. (2021):** Adaptive immunity to SARS-CoV-2 and COVID-  
548 19. *Cell*, 184(4), 861–880.
- 549 **Shah, V. K.; Firmal innate immune responses, P.; Alam, A.; Ganguly, D. and**  
550 **Chattopadhyay, S. (2020):** Overview of Immune Response During SARS-CoV-2  
551 Infection: Lessons From the Past. *Frontiers in immunology*, 11, 1949.
- 552 **Tang, Y.; Liu, J.; Zhang, D.; Xu, Z.; Ji, J. and Wen, C. (2020):** Cytokine Storm in  
553 COVID-19: The Current Evidence and Treatment Strategies. *Frontiers in*  
554 *immunology*, 11, 1708.
- 555 **V'kovski, P., Kratzel, A., Steiner, S., Stalder, H., and Thiel, V. (2021):** Coronavirus  
556 biology and replication: implications for SARS-CoV-2. *Nature reviews.*  
557 *Microbiology*, 19(3), 155–170.
- 558 **Wan, S.; Yi, Q.; Fan, S.; Lv, J.; Zhang, X.; Guo, L.; Lang, C.; Xiao, Q.; Xiao, K.;**  
559 **Yi, Z.; Qiang, M.; Xiang, J.; Zhang, B.; Chen, Y. and Gao, C. (2020):** Relationships  
560 among lymphocyte subsets, cytokines, and the pulmonary inflammation
- 561 **Wang, D.; Hu, B.; Hu, C.; Zhu, F.; Liu, X.; Zhang, J.; Wang, B.; Xiang, H.;**  
562 **Cheng, Z.; Xiong, Y, Zhao, Y.; Li, Y.; Wang, X. and Peng, Z. (2020):** Clinical  
563 Characteristics of 138 Hospitalized Patients With 2019 Novel Coronavirus-Infected  
564 Pneumonia in Wuhan, China. *JAMA*. 2020 Mar 17; 323(11):1061-1069.
- 565 **Weiss, S.R. and Navas-Martin S. (2005):** Coronavirus pathogenesis and the emerging  
566 pathogen severe acute respiratory syndrome coronavirus. *Microbiol Mol Biol*  
567 *Rev.* 2005 Dec; 69(4):635-64.
- 568 **World Health Organization, (2021):** WHO Coronavirus (COVID-19) Dashboard.
- 569 **Ye, Q.; Wang, B. and Mao, J. (2020):** The pathogenesis and treatment of the  
570 'Cytokine Storm' in COVID-19. *The Journal of infection*, 80(6), 607–613.
- 571 **Zhang, J. J.; Dong, X.; Cao, Y. Y.; Yuan, Y. D.; Yang, Y. B.; Yan, Y. Q.; Akdis, C.**  
572 **A. and Gao, Y. D. (2020):** Clinical characteristics of 140 patients infected with SARS-  
573 CoV-2 in Wuhan, China. *Allergy*, 75(7), 1730–1741.

574 **Ziegler, C.; Allon, S. J.; Nyquist, S. K.; Mbanjo, I. M.; Miao, V. N.; Tzouanas, C.**  
575 **N.; Cao, Y.; Yousif, A. S.; Bals, J.; Hauser, B. M.; Feldman, J.; Muus, C.;**  
576 **Wadsworth, M. H.; 2nd, Kazer, S. W.; Hughes, T. K.; Doran, B.; Gatter, G. J.;**  
577 **Vukovic, M.; Taliaferro, F.; Mead, B. E. and ... HCA Lung Biological Network**  
578 **(2020): SARS-CoV-2 Receptor ACE2 Is an Interferon-Stimulated Gene in Human**  
579 **Airway Epithelial Cells and Is Detected in Specific Cell Subsets across**  
580 **Tissues. *Cell*, 181(5), 1016–1035.e19.**

1  
2  
3  
4  
5  
6  
7  
8  
9  
10  
11  
12  
13  
14  
15  
16  
17  
18  
19  
20  
21  
22  
23  
24  
25  
26  
27  
28  
29

## **Correlations between kidney and heart function bioindicators and the expressions of Toll-Like, ACE2, and NRP-1 receptors in COVID-19**

Rabab Hussain Sultan<sup>1\*</sup>, Maged Abdallah<sup>2</sup>, Tarek Mohamed Ali<sup>3</sup>, Hebatallah Hany Assal<sup>4</sup>, Amr E. Ahmed<sup>1</sup>, Basem H Elesawy<sup>5</sup>, and Osama M. Ahmed<sup>6</sup>

1 Biotechnology and Life Sciences Department, Faculty of Postgraduate Studies for Advanced Sciences, Beni-Suef University, Beni-Suef, Egypt.

2 Department of anesthesia and intensive care, Kasr Alaini hospital, Cairo University, Egypt.

3 Department of Physiology, College of Medicine, Taif University, P.O. Box 11099, Taif 21944, Saudi Arabia.

4 Chest Department, Kasr Alaini hospital, Cairo University, Egypt.

5 Department of Pathology, College of Medicine, Taif University, P.O. Box 11099, Taif 21944, Saudi Arabia.

6 Physiology Division, Department of Zoology, Faculty of Science, Beni-Suef University, P.O. Box 62521, Beni-Suef, Egypt.

Corresponding author: Rabab Hussain Sultan, 00201029819222, E-mail: [rababsoltan080@gmail.com](mailto:rababsoltan080@gmail.com)

30 **Fig 1 :** (A, B) shows a comparison between the relative expression of TLR-2 and TLR-4  
31 in all studied groups. There were significant ( $p=0.000$ ), ( $p=0.000$ ) increases respectively,  
32 in TLR2, TLR4 expression levels in moderate and severe cases compared to healthy  
33 controls.

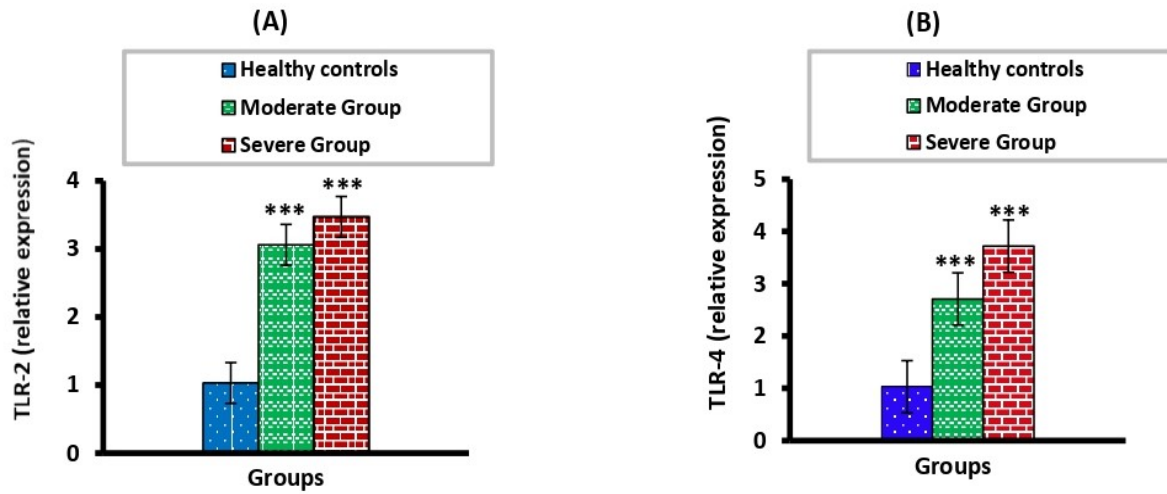

34

35 **Fig 1:** (A) TLR2; Toll-like receptor 2 and (B) TLR4; Toll-like receptor 2 in moderate and severe  
36 groups compared to healthy controls.

37 **Fig 2:** (C, D) shows a comparison between the relative ACE2 and NRP-1 mRNA  
38 expression levels. This figure exhibited that ACE2 and NRP-1 mRNA expression levels  
39 were significantly ( $p=0.000$ ,  $p=0.000$  respectively), increased in the moderate group and  
40 severe group compared to the healthy controls group.

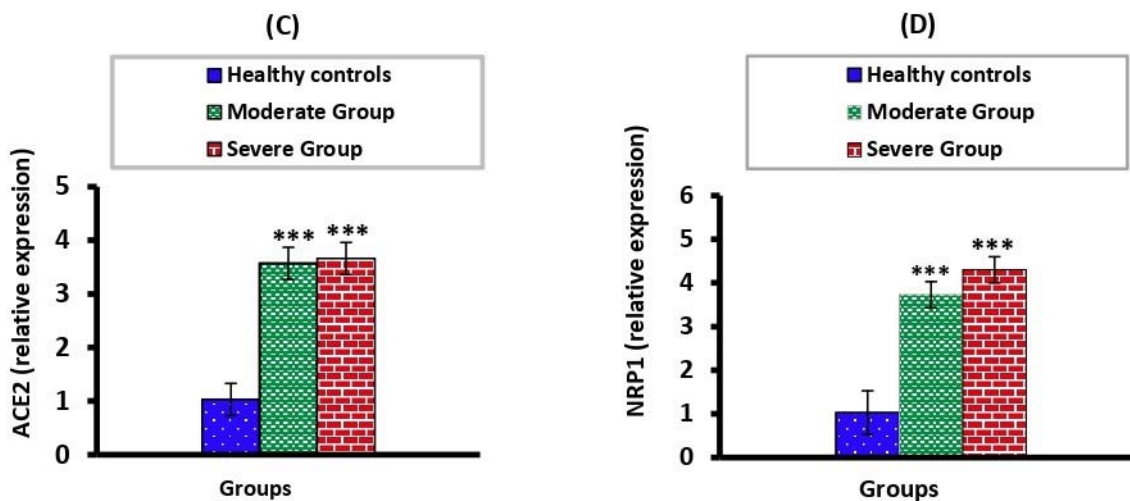

41

42 **Fig 2:** (C) ACE2; Angiotensin-converting enzyme- 2 and (D) NPR-1; Neuropilin-1 in moderate and  
43 severe groups compared to healthy control

44 **Fig 3: (E-I) in the moderate group**, shows a significant positive correlation between  
45 urea and TLR2 ( $p=0.000$ ). Also, positively correlated between CKMB and Troponin I  
46 with both TLR2 ( $p=0.000$ ), ( $p<0.05$ ) and TLR4 ( $p=0.000$ ,  $p=0.000$ , respectively).

47

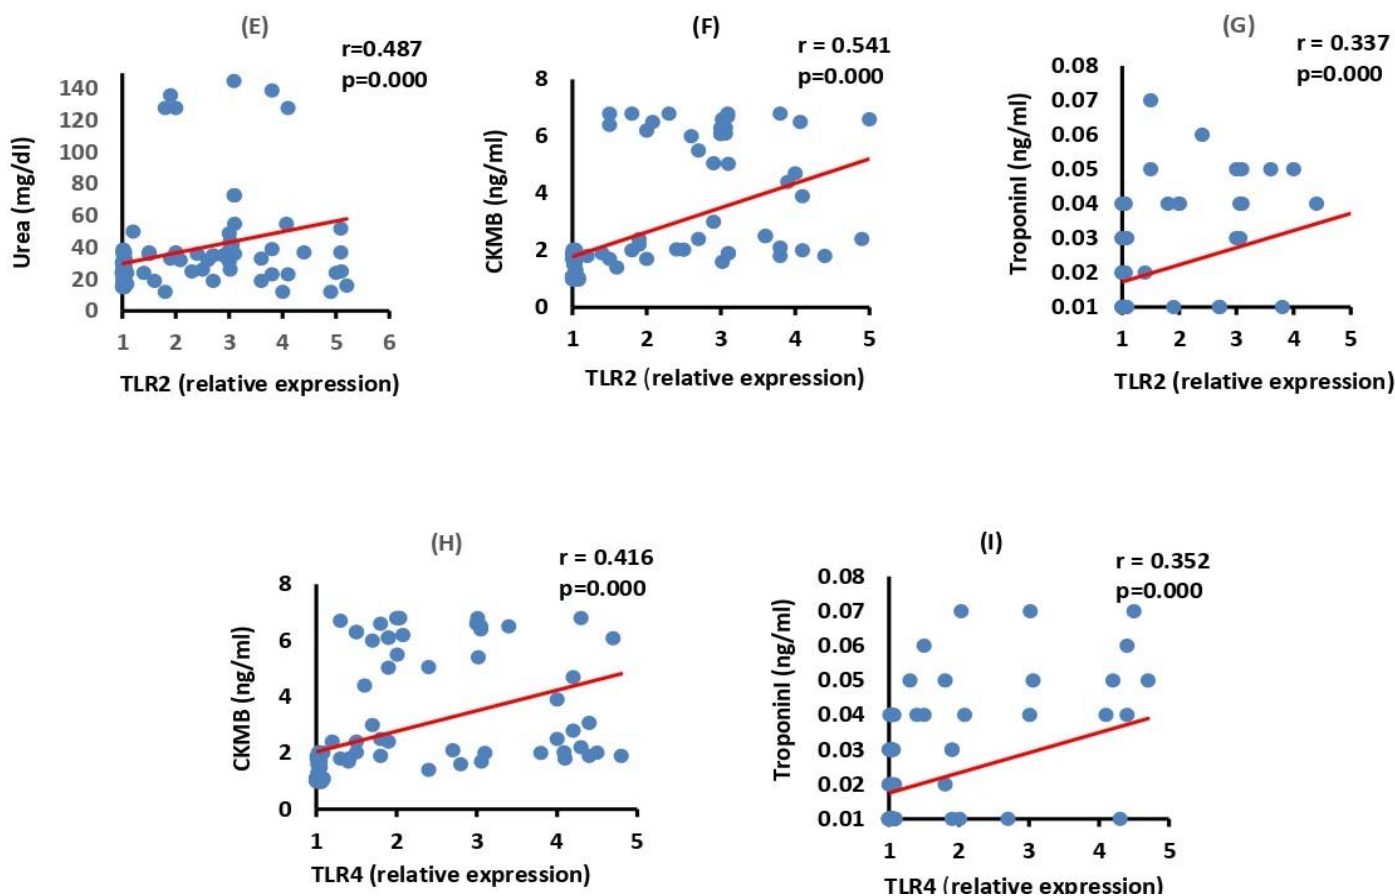

49

50

51 **Fig 3: (E-I)** Correlations among the moderate group, between TLR2 with (E) urea, (F) CKMB, (G)  
52 Troponin I and TLR4 with (H) CKMB, (I) Troponin I. Correlation was significant \*\* at the 0.01 level,  
53 \*\*\* at the 0.001 level. CKMB: creatinine kinase myocardial band; TLR2, 4: Toll-like receptor 2, 4.

54

55

56

57 **Fig4: (J-M)** ACE2 and NRP-1 mRNA expression levels, exhibited a significant positive  
58 ( $p=0.000$ ) correlation with TLR2, TLR4 in the moderate group.

59

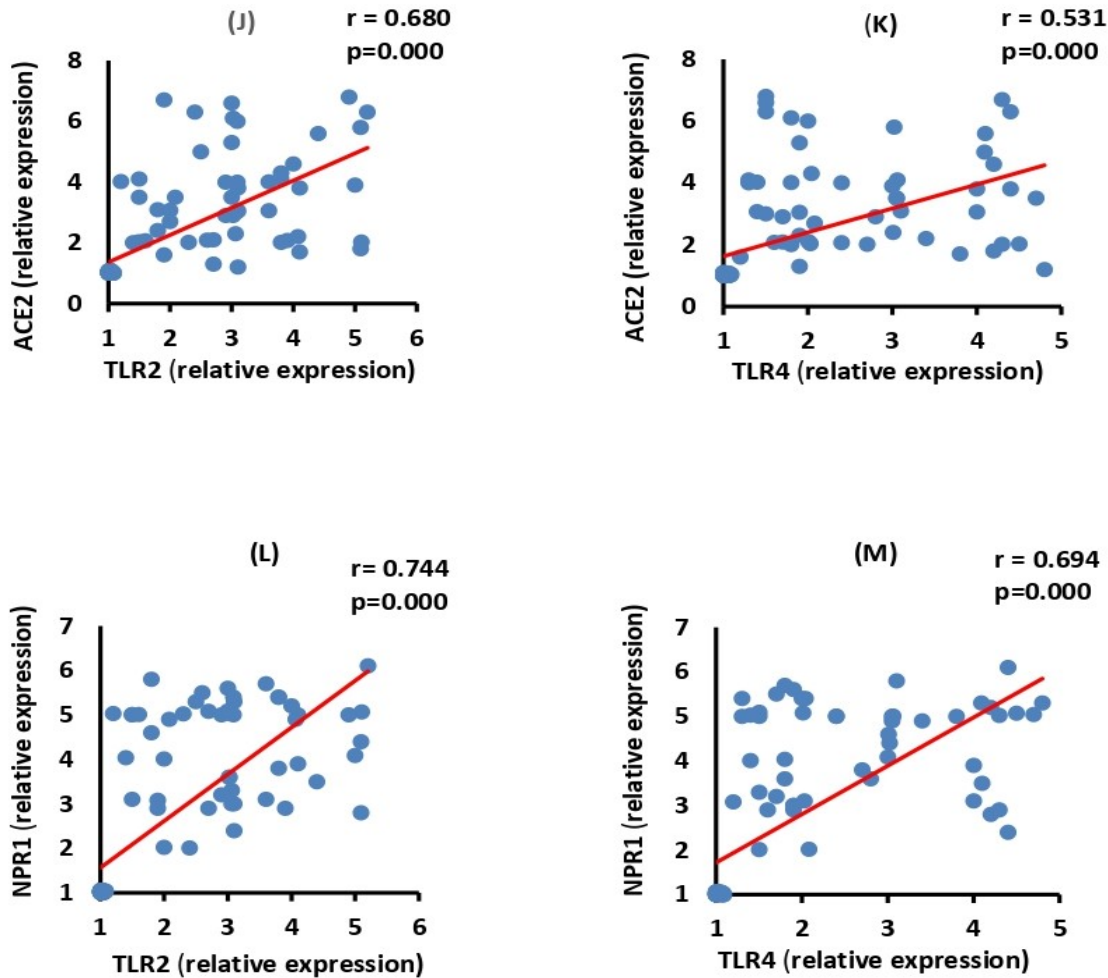

60

61 **Fig 4: (J-M)** Correlations among the moderate group, between ACE2 with (J) TLR2, (K) TLR4, and  
62 NRP-1 with (L) TLR2, (M) TLR4. The correlation was significant \*\* at the 0.01 level, \*\*\* at the 0.001  
63 level. ACE2: Angiotensin-converting enzyme; NPR1: Neuropilin-1 and TLR2, 4: Toll-like receptor 2, 4.

64

65

66

67

68



69 **Fig 5 :**( N-Q) in the severe group, both serum creatinine and urea were positively  
70 correlated to TLR2 and TLR4 ( $p < 0.05$ ).

71

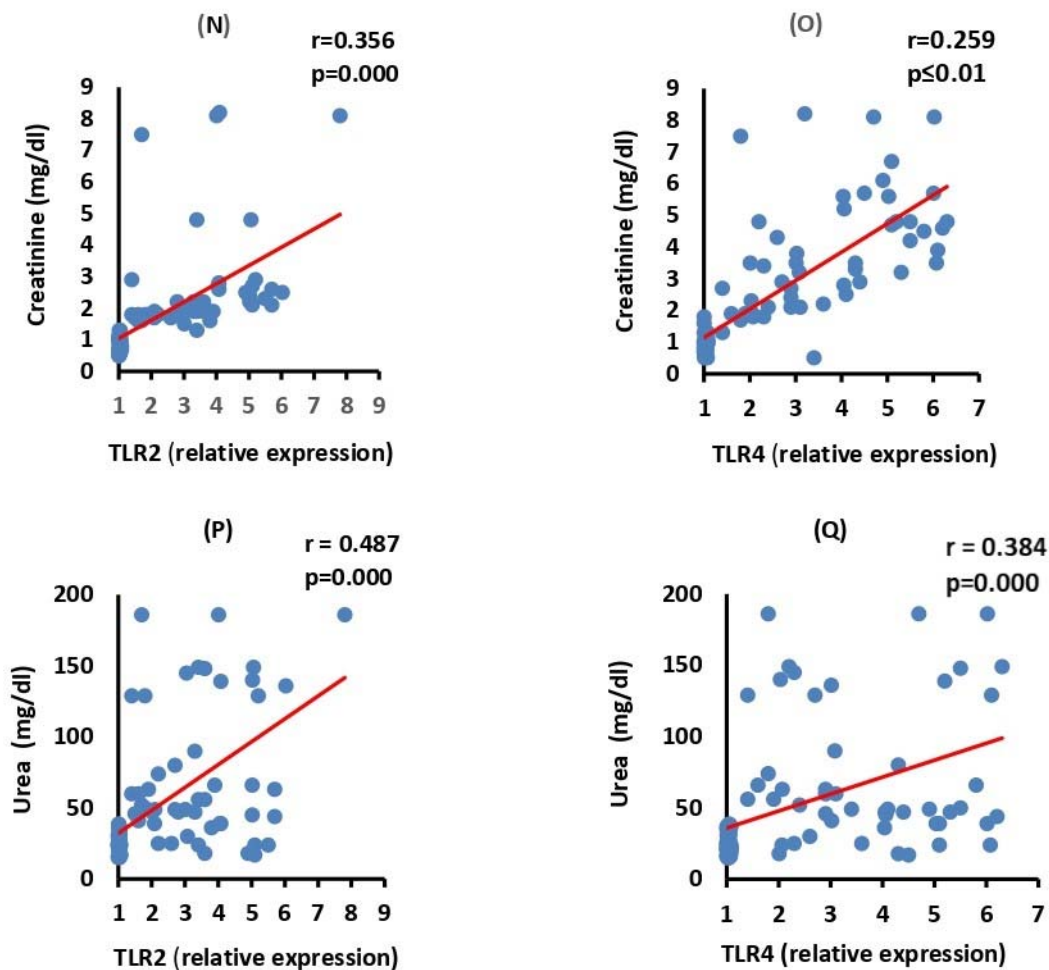

72

73 **Fig 5:** (N-Q) Correlations among the severe group, between creatinine with (N) TLR2, (O)  
74 TLR4, and urea with (P) TLR2, (Q) TLR4. The correlation was significant \*\* at the 0.01 level, \*\*\*  
75 at the 0.001 level. TLR2, 4: Toll-like receptor 2, 4.

76

77

78

79

80 **Fig 6 :**( R-T) CKMB showed a positive correlation with TLR2 ( $p=0.000$ ) and TLR4  
81 ( $p<0.05$ ). Furthermore, Troponin I observed a positive correlation with TLR4 ( $p<0.05$ )  
82 among the severe group.

83

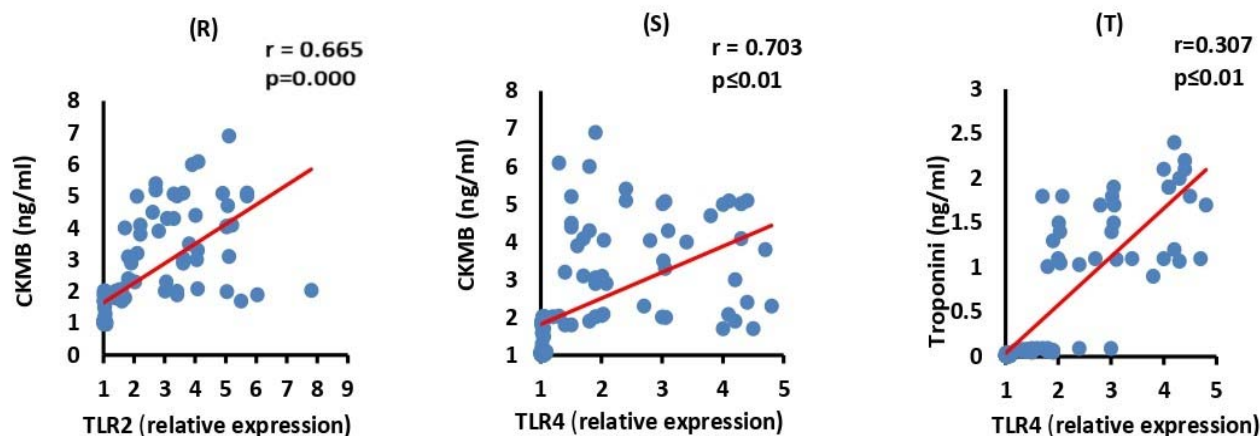

84

85 **Fig 6: (R-T)** Correlations among the severe group, between CKMB with (R) TLR2, (S) TLR4 and  
86 Troponin I with (T) TLR4. The correlation was significant \*\* at the 0.01 level, \*\*\* at the 0.001  
87 level.

88 CKMB: creatinine kinase myocardial band; TLR2, 4: Toll-like receptor 2, 4.

89

90 **Fig 7 :**( U, V) shows that ACE2 mRNA expressions were positively ( $p=0.000$ ) correlated  
91 with TLR2 and TLR4 in the severe group.

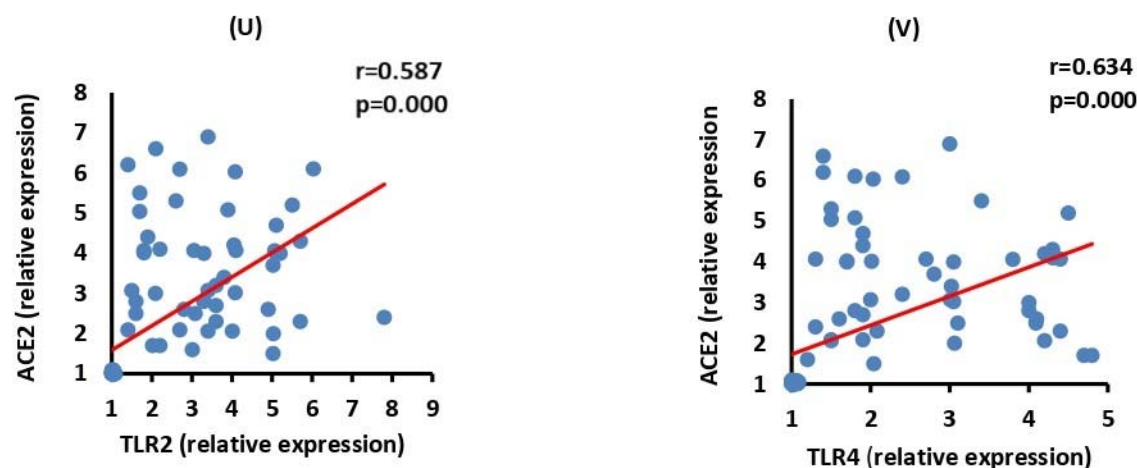

93 **Fig 7: (U, V)** Correlations among the severe group, between ACE2 with (U) TLR2, (V) TLR4. The  
94 correlation was significant \*\* at the 0.01 level, \*\*\* at the 0.001 level. ACE2: Angiotensin-converting  
95 enzyme; TLR2, 4: Toll-like receptor 2, 4.

96

97

98

99 **Fig 8:** (W, X) shows that NRP-1 mRNA expressions were positively (p=0.000)  
100 correlated  
101 to TLR2 and TLR4 in the severe group.  
102

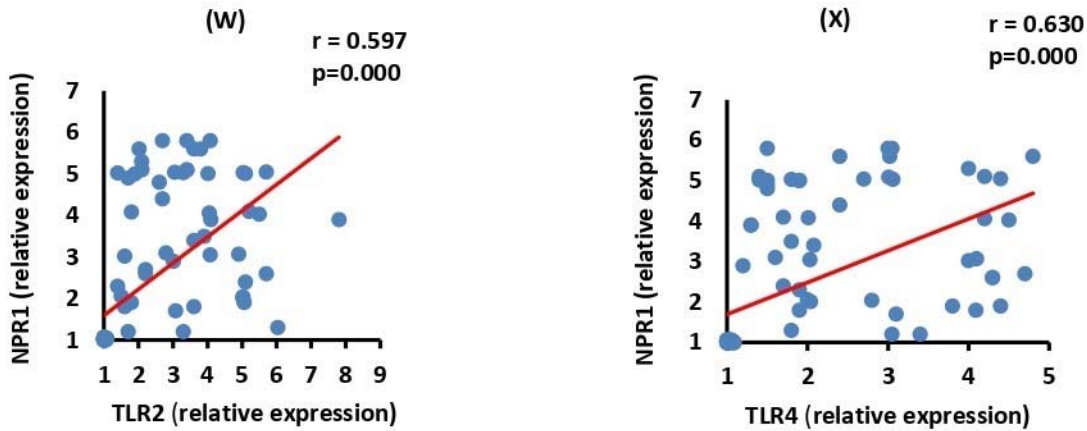

103

104 **Fig 8:** (W, X) Correlations among the severe group, between NRP-1 with (W) TLR2, (X) TLR4. The  
105 correlation was significant \*\* at the 0.01 level, \*\*\* at the 0.001 level. ACE2: Angiotensin-converting  
106 enzyme; NPR-1: Neuroplini-1; TLR2, 4: Toll-like receptor 2, 4.

107
